# Supplementary material
Source: PubMed Central journal article supplement (PMC3984597)

**A1**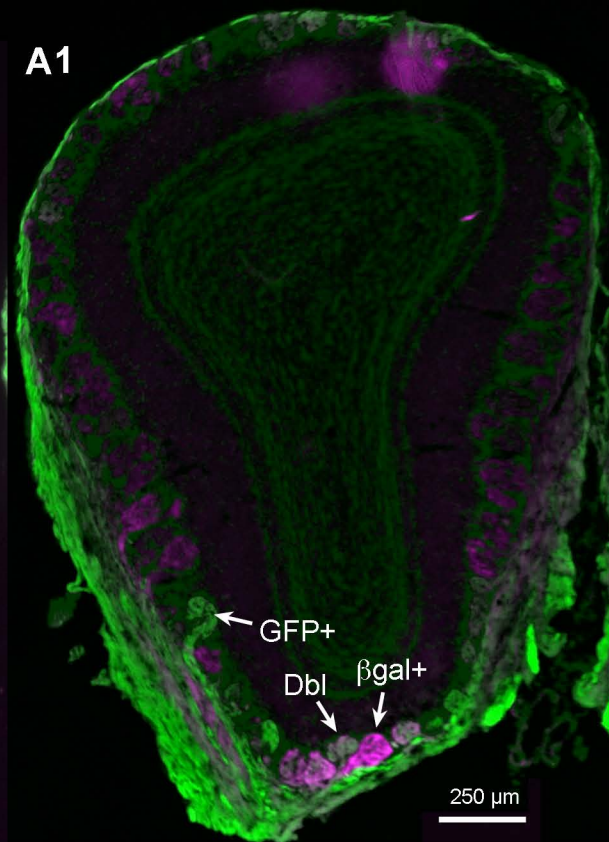**A2**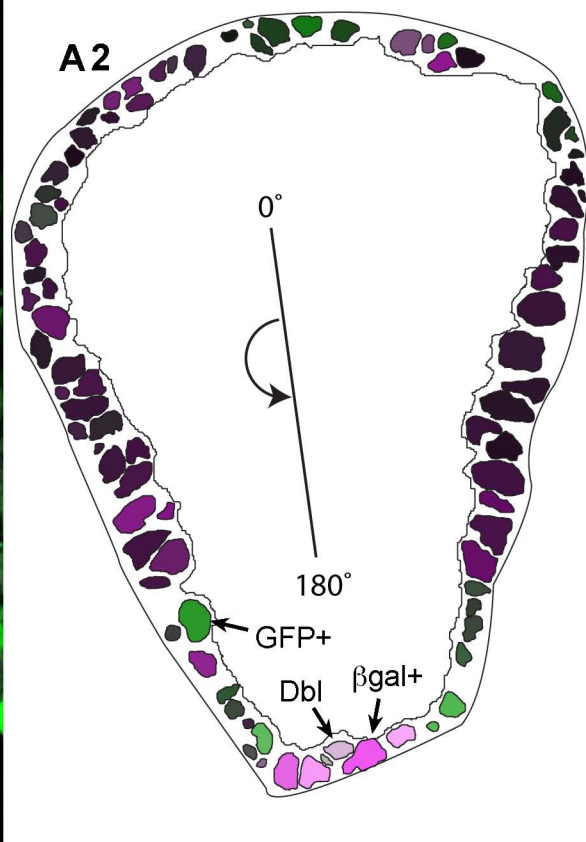**B**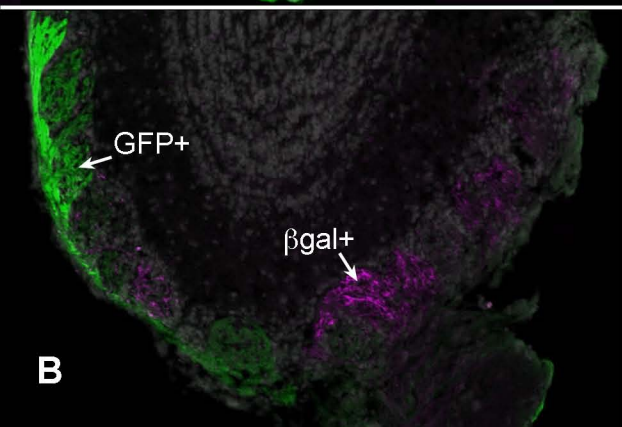**C**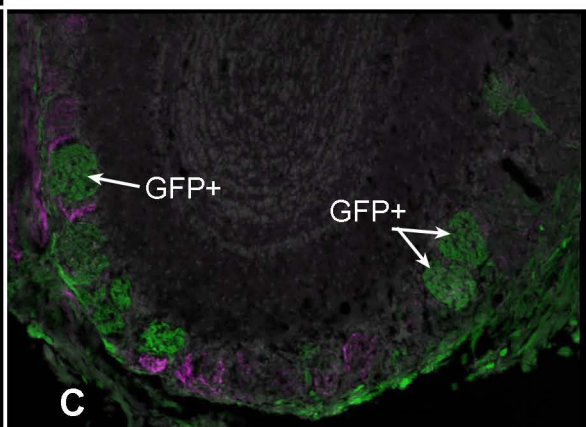**D**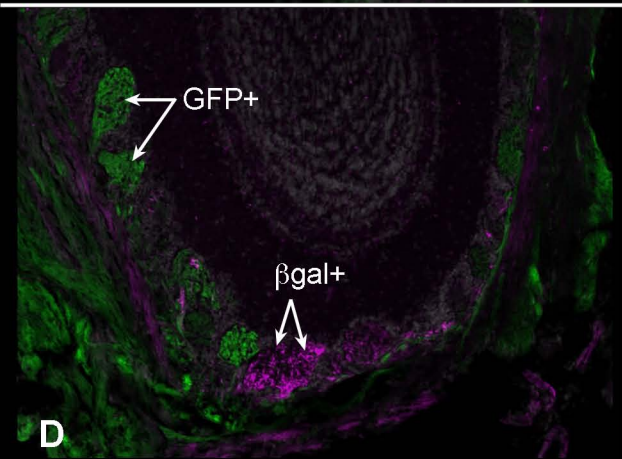**E**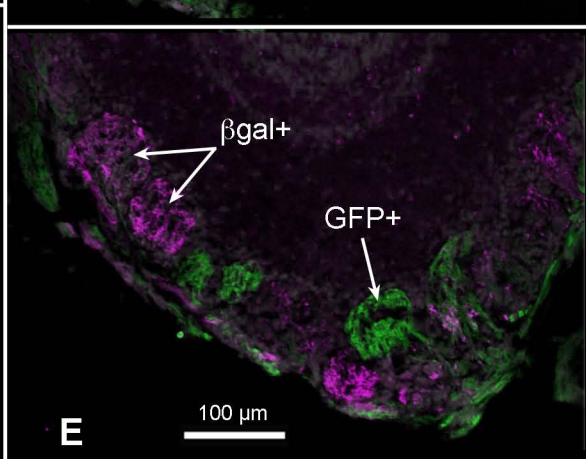

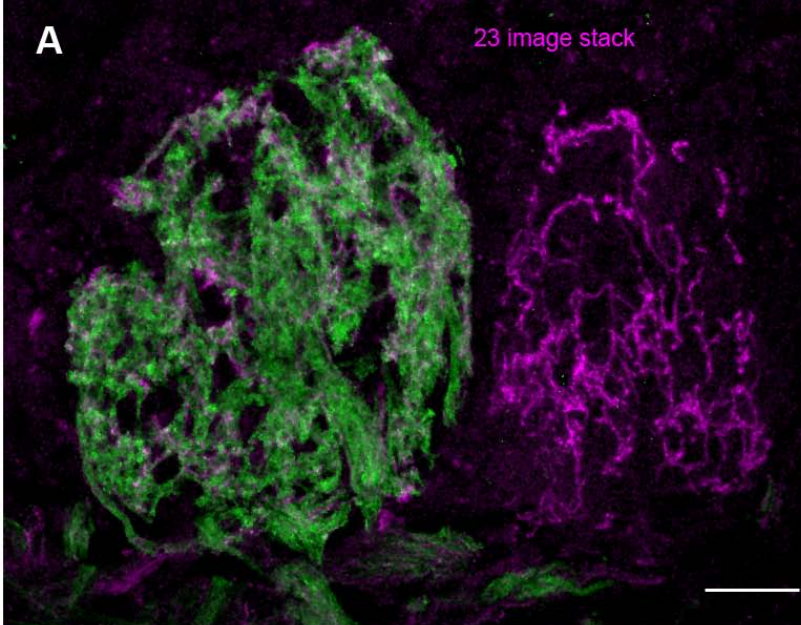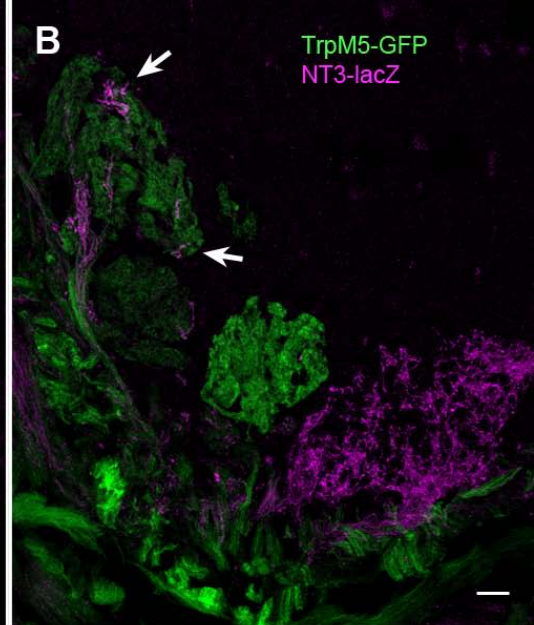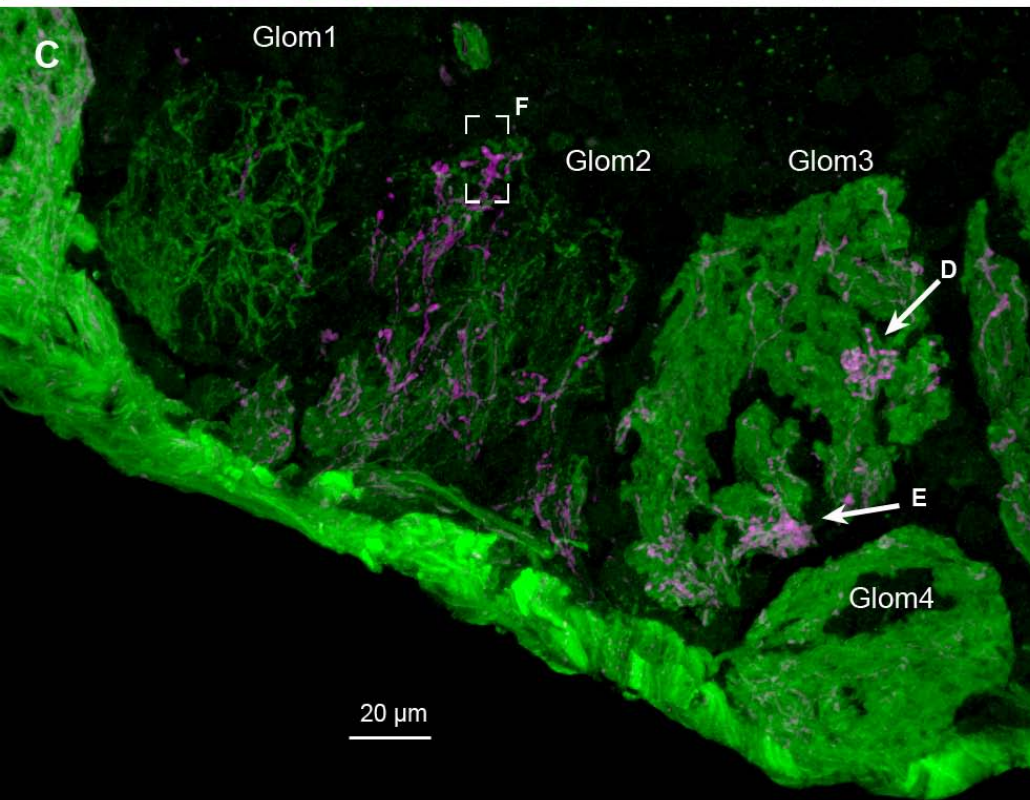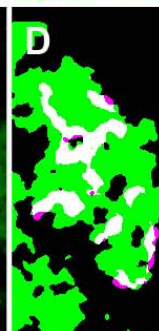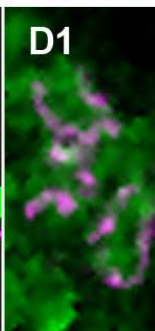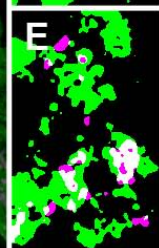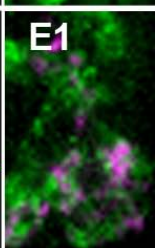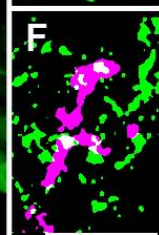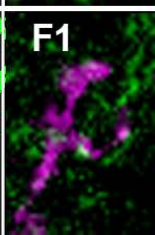

**A**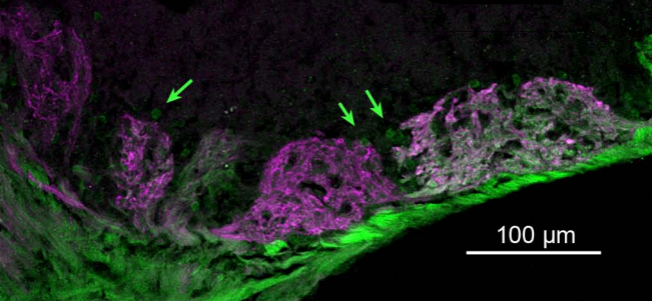**B**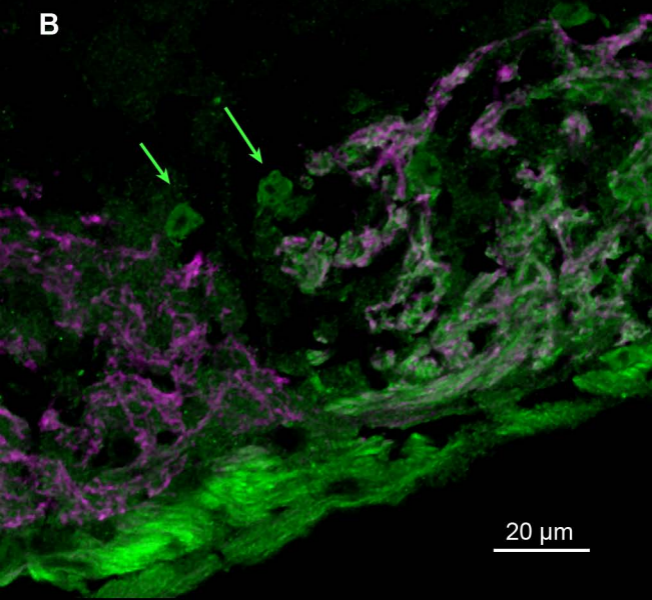

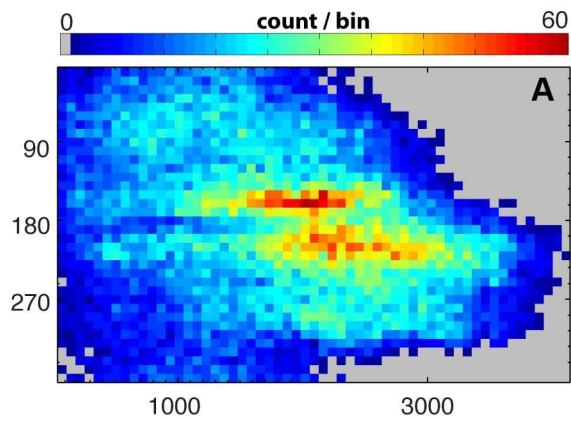

2 S.D. threshold

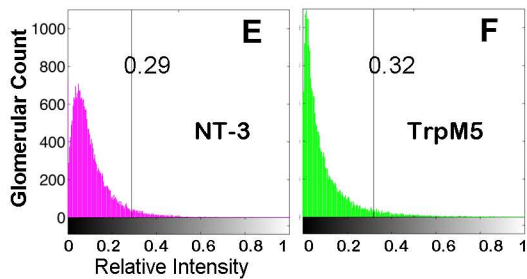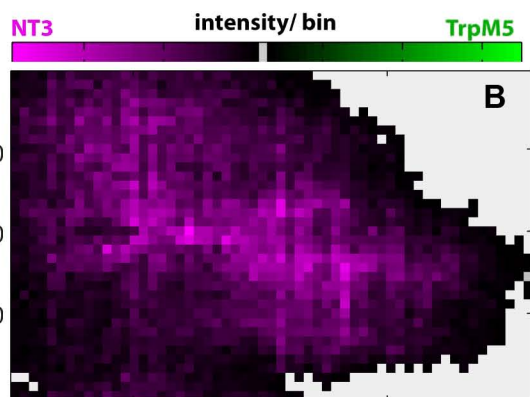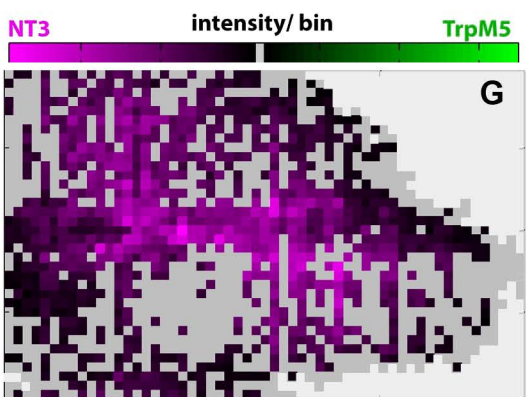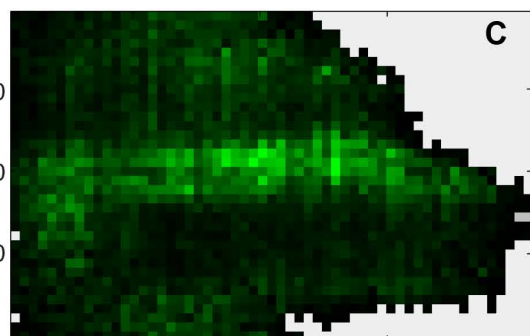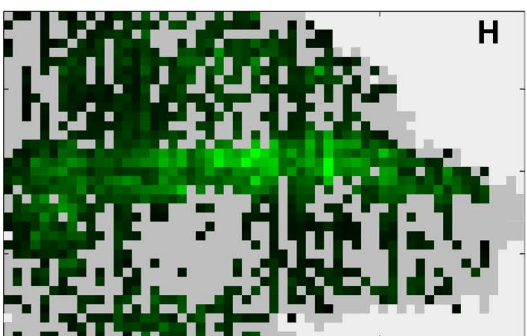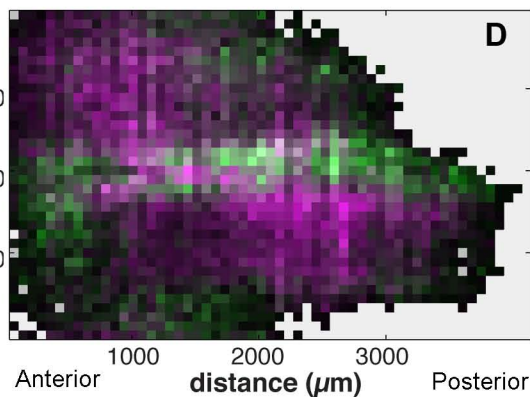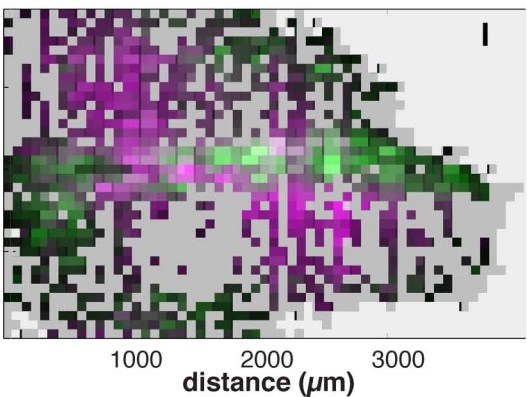

**A**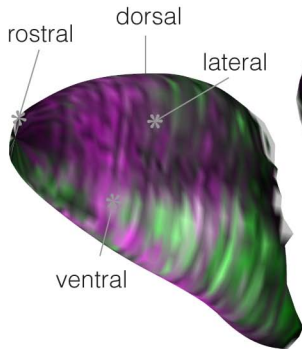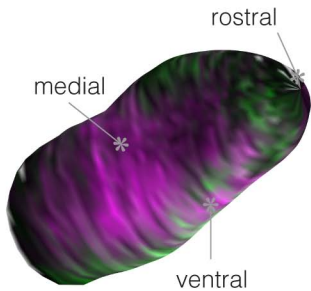**B**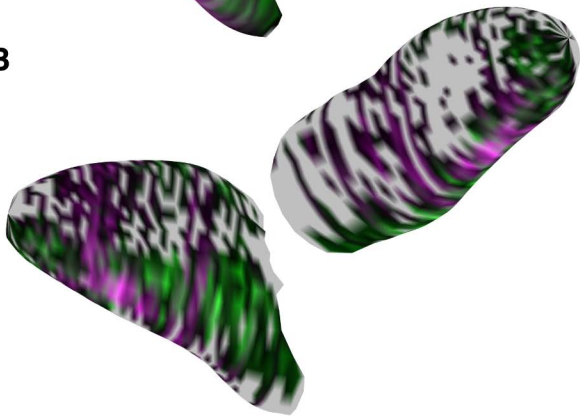

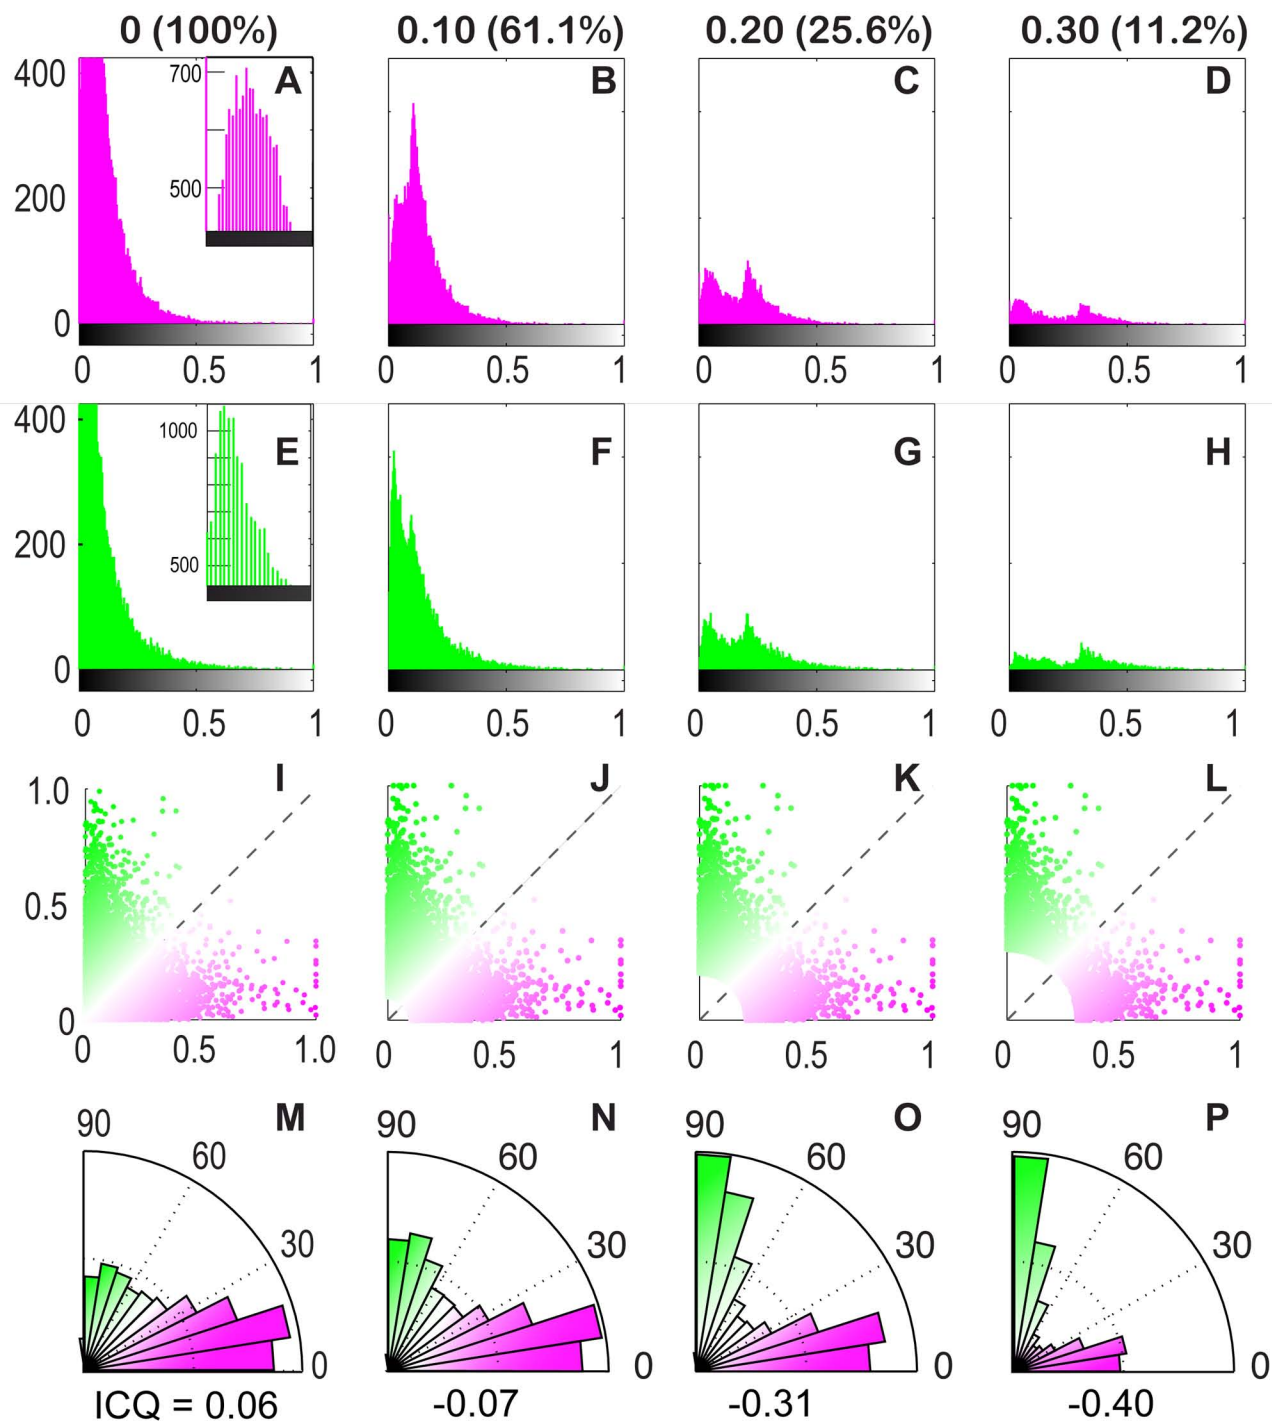

Supplement: NIHMS546987-supplement-supplemental_figures.pdf [file NIHMS546987-supplement-supplemental_figures.pdf]
